# Supplementary material
Source: PubMed Central journal article supplement (PMC3533298)
Supplement: JCI64993sd.pdf [file JCI64993sd.pdf]

## Supplemental Figure 1

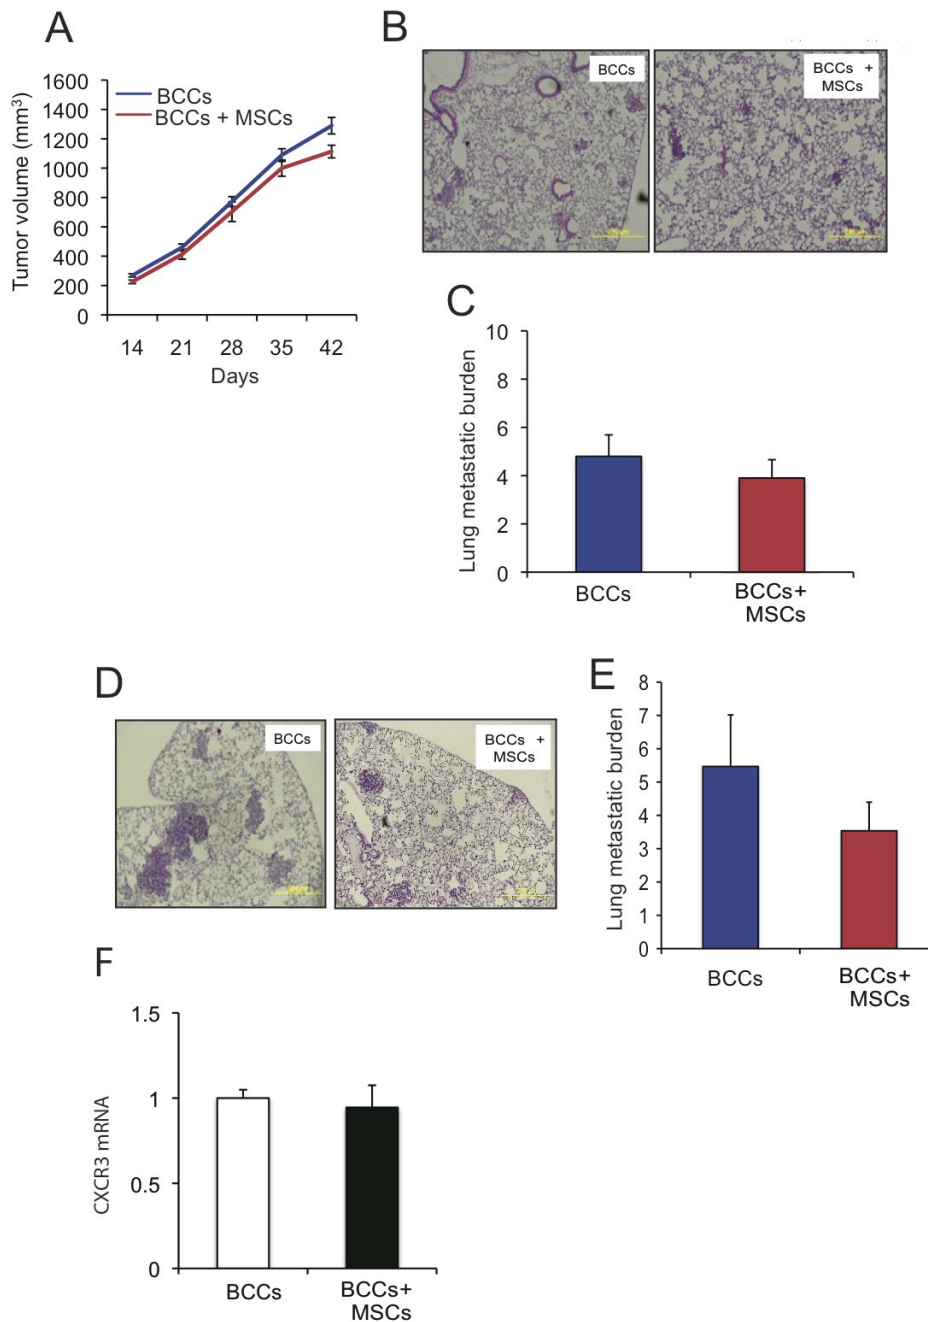

MFP injection of BCCs mixed with MSCs without prior co-culture or intravenous injection of MSCs co-cultured with BCCs does not significantly affect lung metastasis. **(A-C)**  $0.5 \times 10^6$  GFP-expressing BCCs were mixed with  $0.5 \times 10^6$  MSCs and immediately injected into the MFP of SCID mice. **(A)** Tumors were measured with calipers and tumor volume (mean  $\pm$  SEM;  $n = 5$ ) was plotted against time. **(B)** Lung sections were analyzed for metastases by H&E staining. Scale bar, 200  $\mu$ m. **(C)** Lung DNA was used to quantify metastatic burden by qPCR using GFP primers. **(D-E)** BCCs+MSCs were co-cultured for 48 hours prior to intravenous injection. **(D)** Photomicrographs of H&E-stained lung sections are shown. Scale bar, 200  $\mu$ m. **(E)** Lung DNA was used to quantify metastatic burden by qPCR using GFP primers. **(F)** CXCR3 mRNA levels in primary tumors were determined by RT-qPCR.

## Supplemental Figure 2

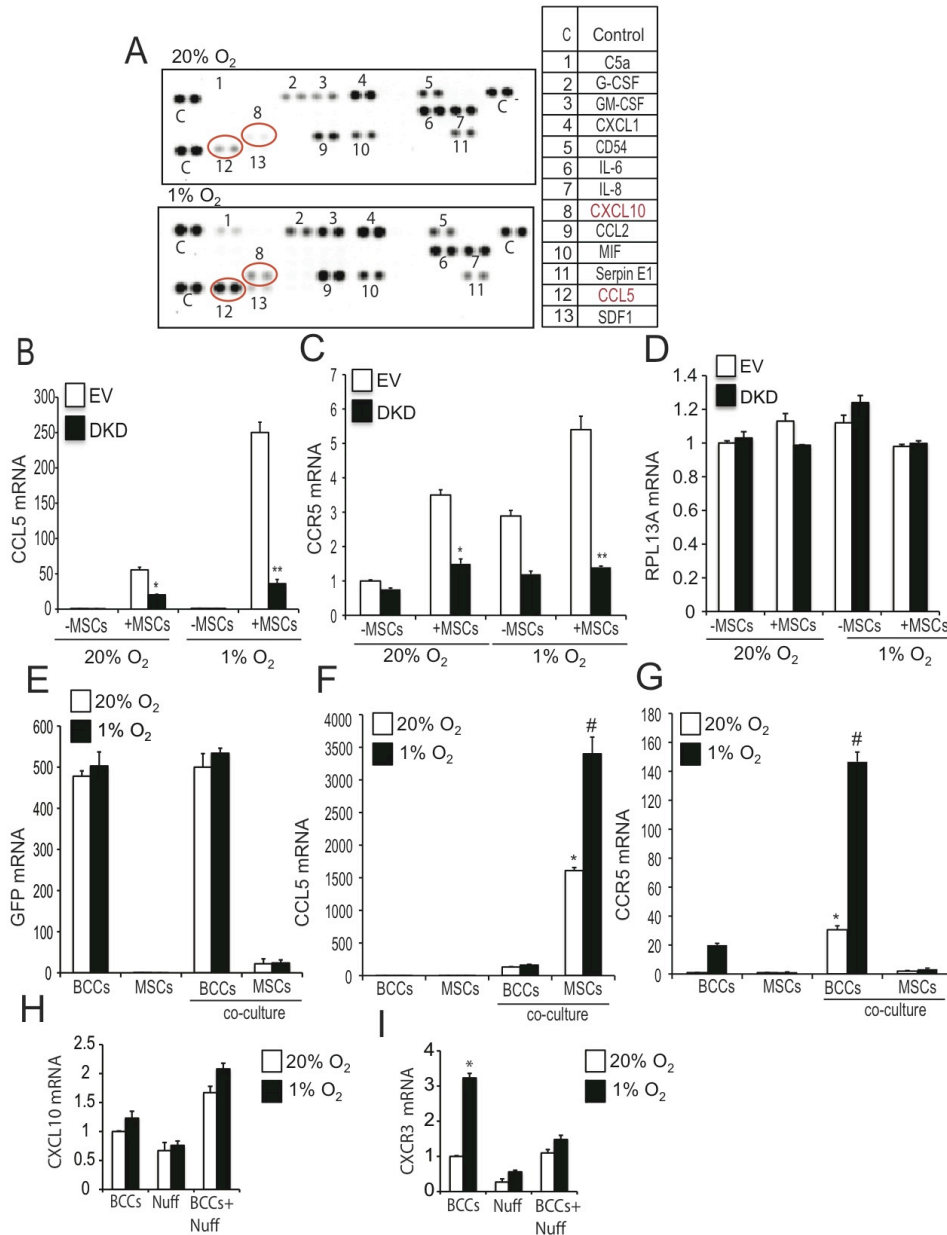

CCR5 mRNA levels. BCCs and MSCs cultured alone were used as controls. Levels were normalized to those observed in BCCs at 20% O<sub>2</sub>. \**P*<0.01 vs MSCs or BCCs alone at 20% O<sub>2</sub> and #*P*<0.001 vs MSCs or BCCs alone at 1% O<sub>2</sub> by one-way ANOVA. (H-I) BCCs, MSCs, or BCCs+Nuff (normal human foreskin fibroblasts) were cultured under 20% or 1% O<sub>2</sub> for 48 hours for RT-qPCR analysis of CXCL10 and CXCR3 mRNA levels, which were normalized to those observed in BCCs at 20% O<sub>2</sub>. \**P*<0.05 vs BCCs at 20% O<sub>2</sub>.

Co-culture and hypoxia-induced expression of chemokines. (A) A chemokine and cytokine antibody array was incubated with CM isolated from co-culture of MSCs and BCCs at 20% or 1% O<sub>2</sub> for 48 hours. Out of 33 cytokines and chemokines analyzed, levels of 13 proteins (identified in the table) in the CM were altered in response to hypoxia. (B-D) CCL5, CCR5 and RPL13A mRNA levels (mean ± SEM; *n* = 3) were analyzed in MDA-231-EV and MDA-231-DKD BCCs that were either cultured alone or with MSCs at 20% or 1% O<sub>2</sub>. \**P*<0.05 vs EV+MSCs at 20% O<sub>2</sub> and \*\**P*<0.001 vs EV+MSCs at 1% O<sub>2</sub> by one-way ANOVA. (E-G) The co-cultured cells were subjected to FACS based on GFP fluorescence for BCCs and CD105 immunofluorescence for MSCs. Total RNA was extracted from flow-sorted BCCs and MSCs for analysis of GFP, CCL5 and

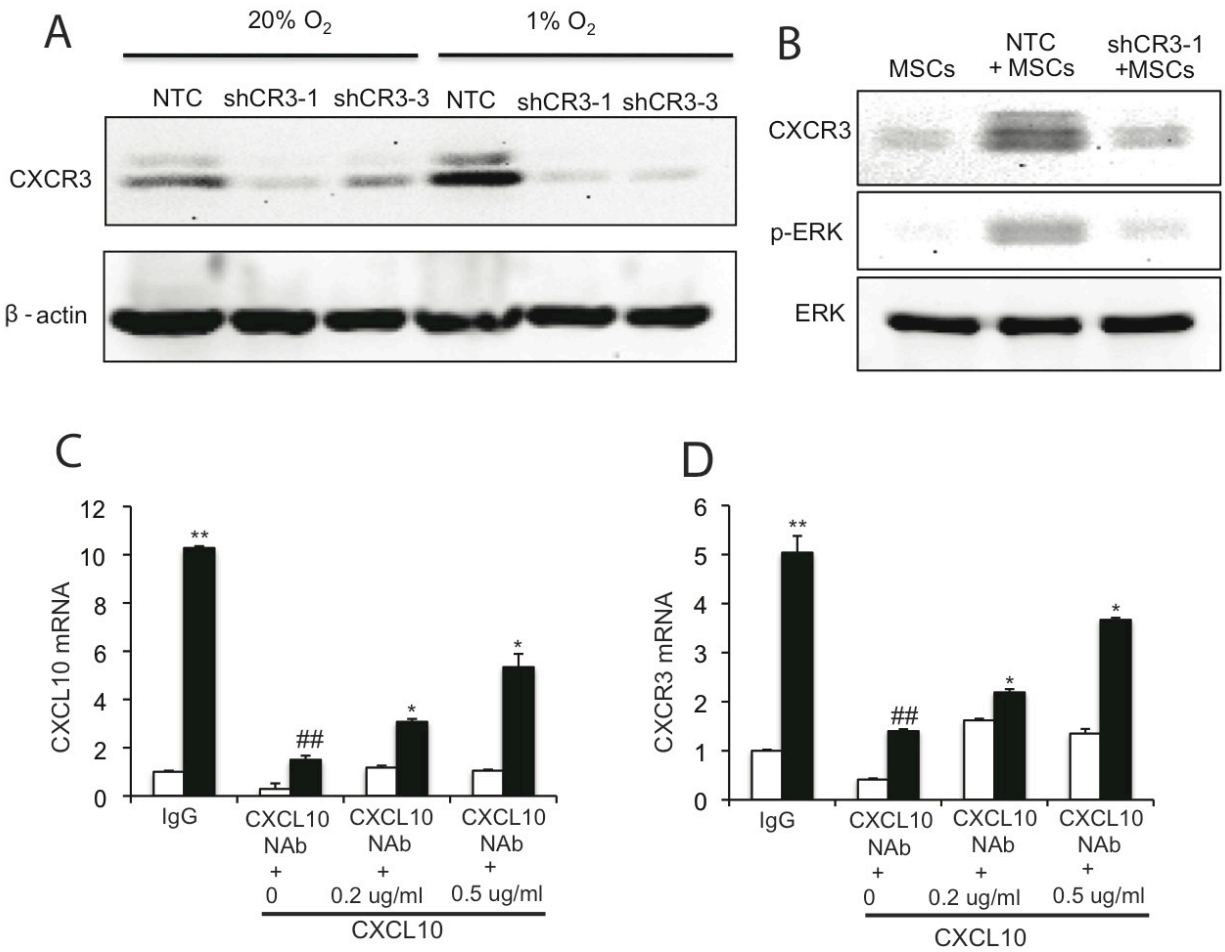

### Supplemental Figure 3

**(A)** CXCR3 protein levels were analyzed in MDA-231 subclones cultured at 20% or 1% O<sub>2</sub> for 48 hours. **(B)** Levels of phosphorylated (pERK) and total (ERK) ERK1/2 MAP kinases were analyzed in protein lysates isolated from NTC and shCR3-1 cells cultured alone or with MSCs at 20% or 1% O<sub>2</sub> for 48 hours. **(C-D)** CXCL10 and CXCR3 mRNA levels (mean  $\pm$  SEM;  $n = 3$ ) were analyzed in MDA-231 BCCs co-cultured with MSCs in the presence of IgG or CXCL10 neutralizing antibody (NAb) and different concentrations of recombinant CXCL10 at 20% or 1% O<sub>2</sub> for 48 hours. \*\* $P < 0.001$  vs IgG at 20% O<sub>2</sub>; ## $P < 0.005$  vs IgG at 1% O<sub>2</sub>; \* $P < 0.05$  vs CXCL10 NAb at 1% O<sub>2</sub>.

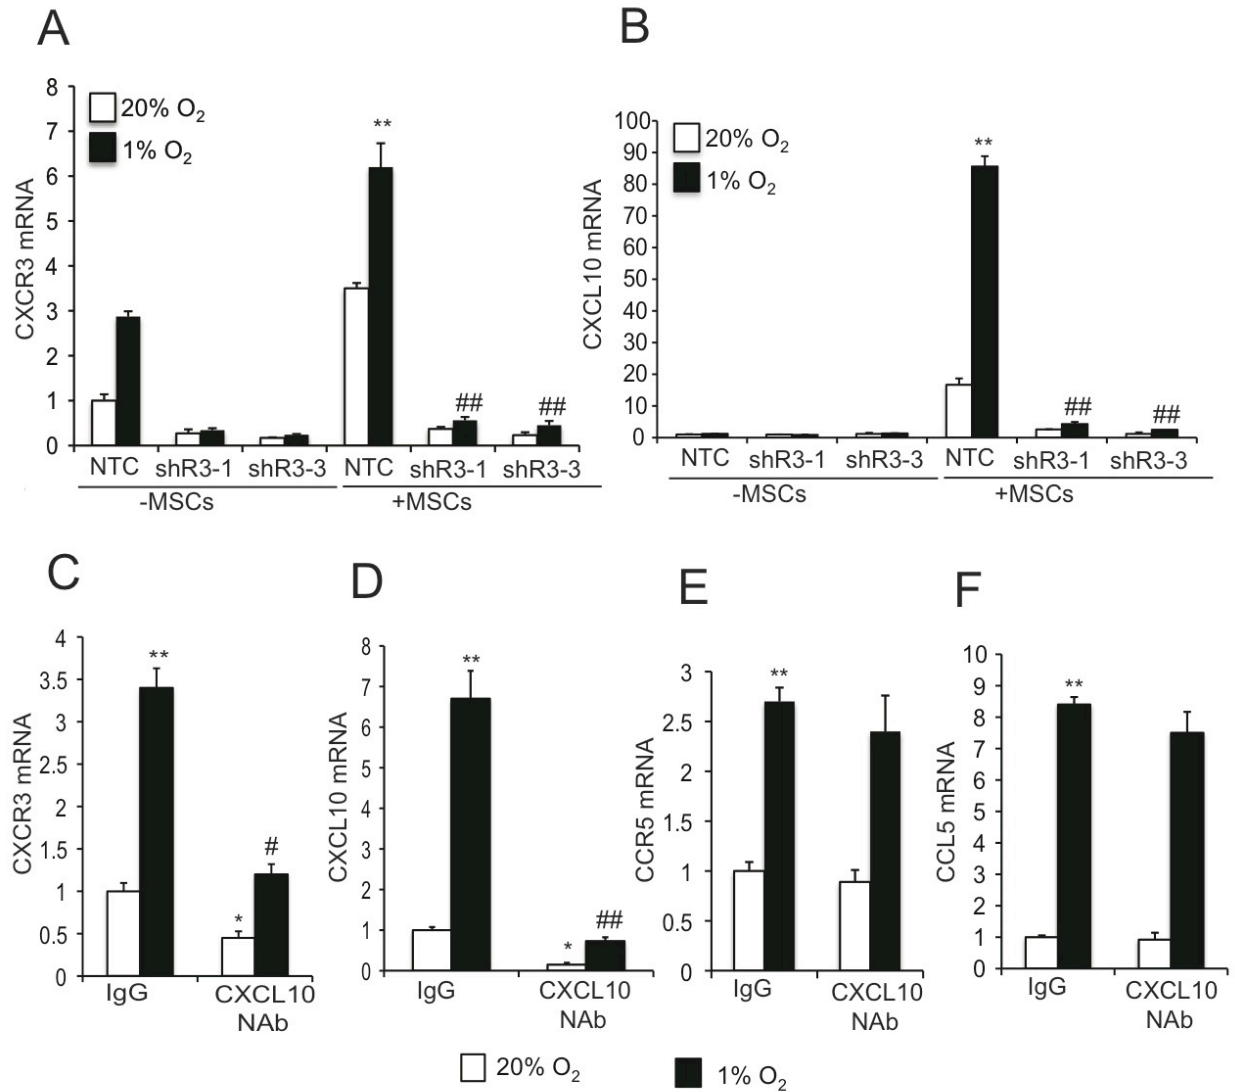

### Supplemental Figure 4

Hypoxia augments crosstalk between MDA-435 BCCs and MSCs by promoting CXCL10 → CXCR3 signaling. **(A-B)** CXCR3 and CXCL10 mRNA levels were analyzed in MDA-435 cells stably transfected with a lentiviral vector encoding a non-targeted control shRNA (NTC) or an shRNA targeted against CXCR3 (shCR3-1 or shCR3-3), either cultured alone or with MSCs at 20% or 1% O<sub>2</sub> for 48 hours. \*\**P*<0.001 vs NTC at 20% O<sub>2</sub>; ##*P*<0.001 vs NTC+MSC at 1% O<sub>2</sub>. **(C-F)** CXCL10, CXCR3, CCL5 and CCR5 mRNA levels (mean ± SEM; *n* = 3) were analyzed in co-cultures of MDA-435 BCCs with MSCs treated with CXCL10 NAb (2 μg) or IgG control for 48 hours at 20% or 1% O<sub>2</sub>. \**P*<0.01 and \*\**P*<0.001 vs IgG at 20% O<sub>2</sub>; #*P*<0.05 and ##*P*<0.001 vs IgG at 1% O<sub>2</sub> by one-way ANOVA.

## Supplemental Figure 5

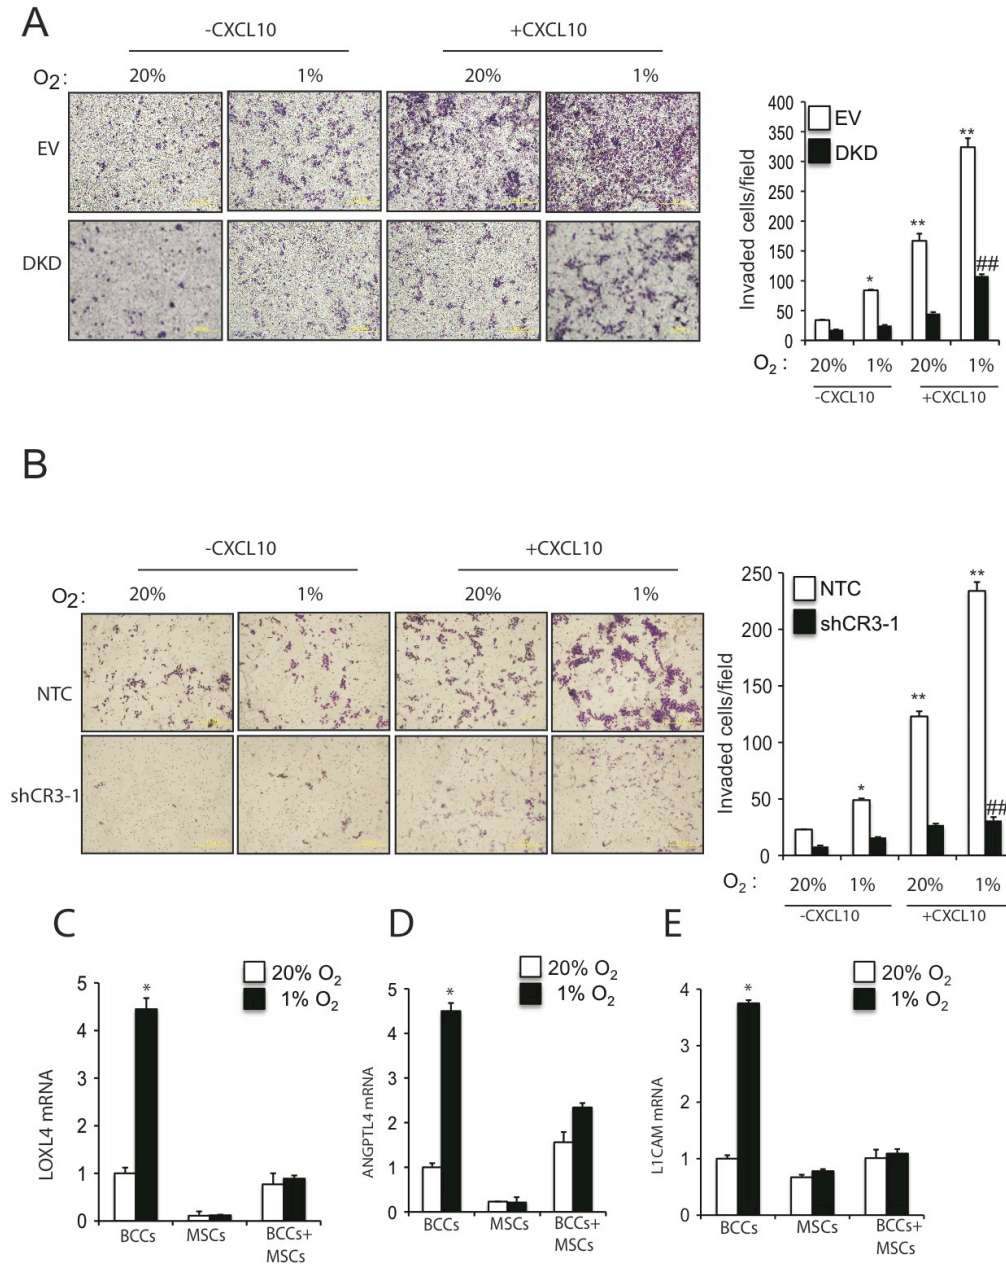

HIF or CXCR3 knockdown BCCs fail to invade in response to CXCL10. (A-B) Invasion of EV, DKD, NTC or shCR3-1 subclone of MDA-231 BCCs in response to CXCL10 at 20% or 1% O<sub>2</sub> was determined using a modified Boyden chamber assay. 0.5x 10<sup>6</sup> EV or DKD BCCs were seeded on top of matrigel-coated chamber inserts. The number of cells that invaded through the matrigel in response to CXCL10 (10 ng/ml) was counted under light microscopy after staining with crystal violet (mean ± SEM; n = 3). \*P<0.05 and \*\*P<0.001 vs control (EV or NTC) at 20% O<sub>2</sub>; ##P<0.001 vs EV or NTC at 1% O<sub>2</sub> by one-way ANOVA.



## Supplemental Figure 6

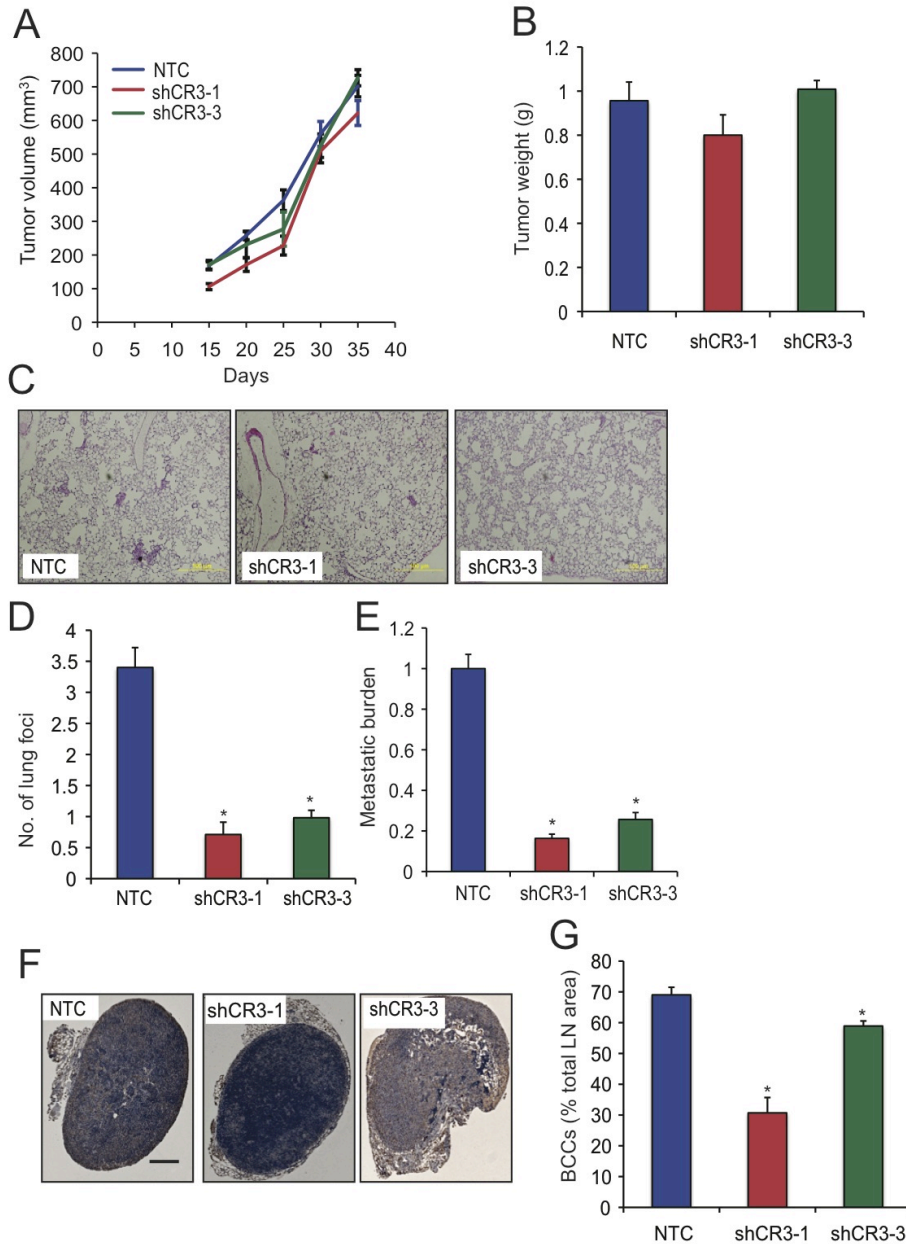

CXCR3 promotes lung and LN metastasis of MDA-231 cells.  $1 \times 10^6$  cells of MDA-231-NTC control subclone and two subclones stably expressing shRNA against CXCR3 (shCR3-1 and shCR3-3) were implanted in the MFP of SCID mice. **(A)** Primary tumor volumes were determined over the experimental time course. **(B)** Primary tumor weight was measured at the end of the experiment. **(C)** Photomicrographs of H&E-stained lung sections are shown. **(D)** Metastatic foci in lung sections were counted under 20x magnification. At least 3 random fields were counted per section. **(E)** Lung DNA was used to quantify BCCs by qPCR with human *HK2* primers. **(F)** LN sections were stained with a human-specific vimentin antibody. **(G)** LN metastasis was quantified by image analysis. \* $P < 0.05$  vs NTC by one-way ANOVA.

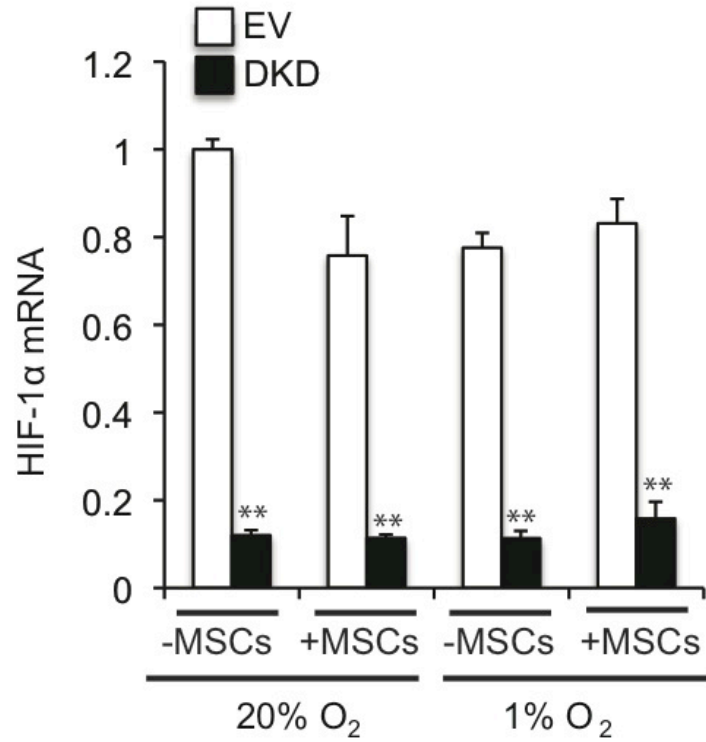

**Supplemental Figure 7**

HIF-1 $\alpha$  mRNA levels (mean  $\pm$  SEM;  $n = 3$ ) were analyzed by RT-qPCR in MDA-231-EV and MDA-231-DKD BCCs cultured alone or with MSCs at 20% or 1% O<sub>2</sub>. \*\* $P < 0.001$  vs EV-MSCs or EV+MSCs at 20% O<sub>2</sub> by one-way ANOVA.

|                   |                   |
|-------------------|-------------------|
| ACGTGCTGTCTCACACA | <i>EPO</i>        |
| ACGTGCAGACAAGCACA | <i>PKM2</i>       |
| ACGTGACTCGGACCACA | <i>ALDOA</i>      |
| ACGTGCCAC----CACA | <i>ANGPTL4</i>    |
| ACGTGCA-----CACA  | <i>COX4I2</i>     |
| ACGTGCAGTT---CACA | <i>CXCR3</i> HRE1 |
| ACGTGGGG-----CACA | <i>CXCR3</i> HRE2 |
| GCGTGCA-----CACA  | <i>PGF</i> HRE1   |

### Supplemental Figure 8

Nucleotide sequences matching the consensus core hypoxia-response element (HRE) sequence from five known HIF target genes [5'-RCGTG(N)<sub>1-8</sub>CACA-3'] are present in the 5'-flanking region (HRE-1) and 3'-flanking region (HRE-2) of the human *CXCR3* gene. HRE-1 in the 5'-flanking region of the *PGF* gene also matched the consensus HRE sequence. Core HIF binding site is highlighted.



## Supplemental Figure 9

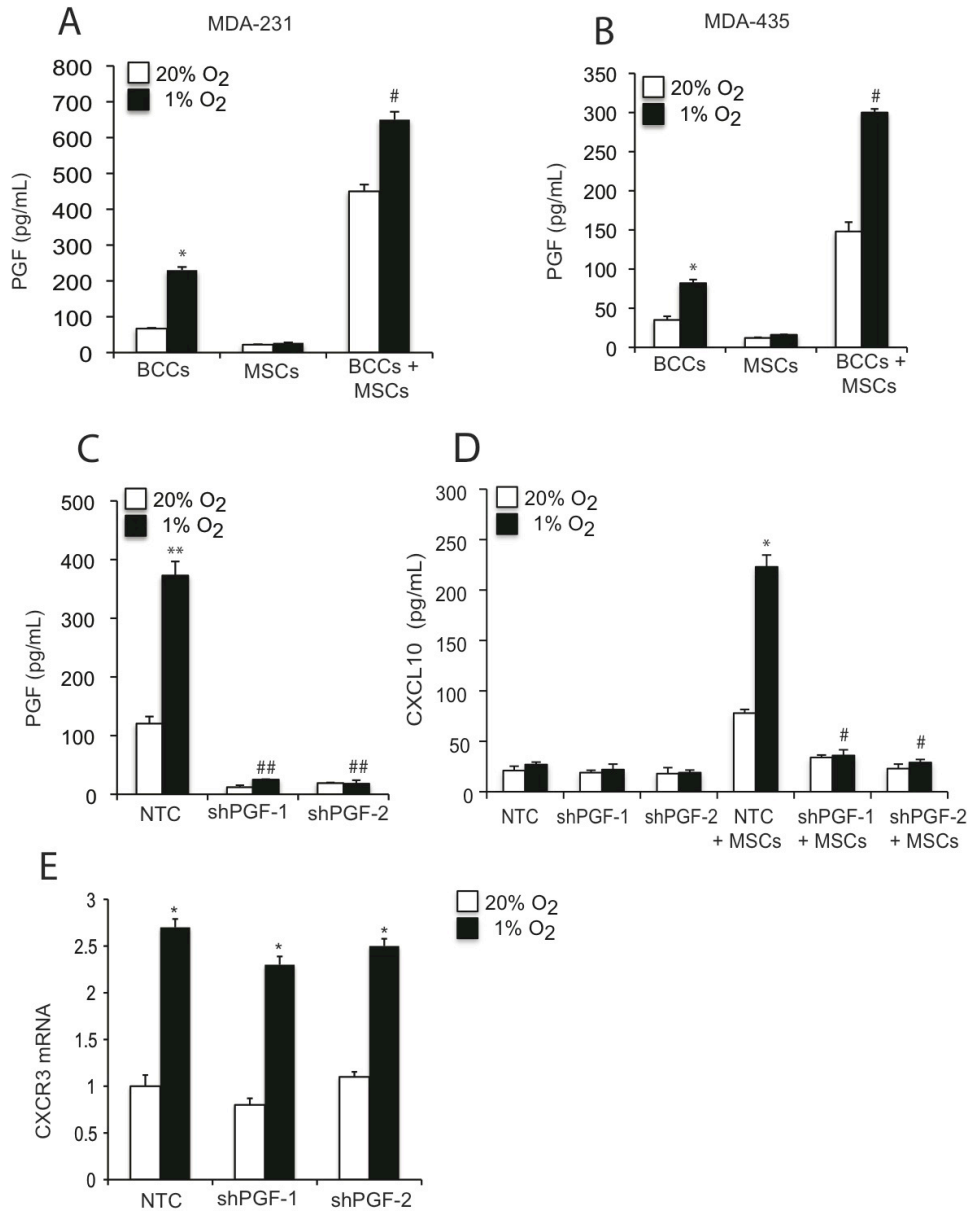

vs NTC at 1% O<sub>2</sub> by one-way ANOVA. **(D)** CM was isolated from MDA-231 BCCs stably transfected with lentiviral vector encoding NTC shRNA or PGF shRNA (shPGF-1 or shPGF-2) that were cultured alone or with MSCs for 48 hours at 20% or 1% O<sub>2</sub>. ELISA was performed to determine PGF protein levels in CM (mean ± SEM; *n* = 3). \**P* < 0.05 vs NTC+MSCs at 20% O<sub>2</sub>; #*P* < 0.005 vs NTC+MSCs at 1% O<sub>2</sub> by ANOVA. **(E)** MDA-231 BCCs stably transfected with lentiviral vector encoding NTC shRNA or PGF shRNA (shPGF-1 or shPGF-2) were cultured alone or with MSCs at 20% or 1% O<sub>2</sub> for 48 hours. CXCR3 mRNA levels were analyzed by RT-qPCR (mean ± SEM; *n* = 3). \**P* < 0.05 vs NTC at 20% O<sub>2</sub> by one-way ANOVA.

Co-culture and hypoxia-induced PGF expression in BCCs. **(A-B)** Conditioned medium (CM) was isolated from MDA-231 **(A)** or MDA-435 **(B)** BCCs that were cultured alone or with MSCs for 48 hours at 20% or 1% O<sub>2</sub>. ELISA was performed to determine PGF protein levels in CM (mean ± SEM; *n* = 3). \**P* < 0.05 vs BCCs at 20% O<sub>2</sub>; #*P* < 0.01 vs all other conditions by ANOVA. **(C)** CM was isolated from MDA-231 cells stably transfected with lentiviral vector encoding NTC shRNA or PGF shRNA (shPGF-1 or shPGF-2) that were cultured at 20% or 1% O<sub>2</sub>. ELISA was performed to determine PGF protein levels in CM (mean ± SEM; *n* = 3). \*\**P* < 0.005 vs NTC at 20% O<sub>2</sub>; ##*P* < 0.001

## Supplemental Table 1

| Primers             | Sequence                  |
|---------------------|---------------------------|
| Hs-HK2-FWD          | CCAGTTCATTACATCATCAG      |
| Hs-HK2-REV          | CTTACACGAGGTCACATAGC      |
| EGFP-FWD            | CAAGGACGACGGCAACTACAAGAC  |
| EGFP-REV            | GTGGCTGTTGTAGTTGTACTCCAGC |
| CXCR3-FWD           | AAGTACGGCCCTGGAAGACT      |
| CXCR3-REV           | GGCGTCATTTAGCACTTGGT      |
| CXCL10-FWD          | CCCACGTGTTGAGATCATTG      |
| CXCL10-REV          | CACTGGGTAAAGGGGAGTGA      |
| CCR5-FWD            | GGCAAAGACAGAAGCCTCAC      |
| CCR5-REV            | AACCTTCTGCAACACCAACC      |
| CCL5-FWD            | TGCAGAGGATCAAGACAGCA      |
| CCL5-REV            | GAGCACTTGCCACTGGTGTGTA    |
| PGF-FWD             | GCCTGGATGAGAAACAGCTC      |
| PGF-REV             | GAGAATCTGGCTTGGCAGTC      |
| VEGFR1-FWD          | AATCATTCCGAAGCAAGGTG      |
| VEGFR1-REV          | TTTCTTCCCACAGTCCCAAC      |
| MMP9-FWD            | GGGACGCAGACATCGTCATC      |
| MMP9-REV            | TCGTCATCGTCGAAATGGGC      |
| LOX-FWD             | GTTCCAAGCTGGCTACTC        |
| LOX-REV             | GGGTTGTCTCGTCAGAGTAC      |
| HIF-1 $\alpha$ -FWD | CGTTGTGAGTGGTATTATTTCAGCA |
| HIF-1 $\alpha$ -REV | CAGTTTCTGTGTCGTTGCTGCC    |
| RPL13A-FWD          | GAGGCGAGGGTGATAGAG        |
| RPL13A-REV          | ACACACAAGGGTCCAATTC       |
| Hs-SRY-FWD          | GCTGGGATACCAGTGGAAAA      |
| Hs-SRY-REV          | CCTTCCGACGAGGTGCGATACT    |
| Hs 18S-FWD          | GAGGATGAGGTGGAACGTGT      |
| Hs 18S-REV          | AGAAGTGACGCAGCCCTCTA      |
| CXCR3-HRE1 chip FWD | GAGGGAGCATTACTGCCTGA      |
| CXCR3-HRE1 chip REV | AAACAATGCACAACCTAGATCC    |
| CXCR3-HRE2 chip FWD | AAGGCTAATCCTAGCCATCTCC    |
| CXCR3-HRE2 chip REV | TCAGAAAGATGGGACCCGTA      |
| PGF-HRE1 chip FWD   | GCGGGTCTCGAACTCCTAAT      |
| PGF-HRE1 chip REV   | TGGTAGCAATTGATCACGATT     |
| PGF-HRE2 chip FWD   | AGGGAGGGCACACACAAAC       |
| PGF-HRE2 chip REV   | TGTTCGTGTCCGCTGTGTAT      |
